# Supplementary material for: Amelioration of Obesity in Mice Fed a High-Fat Diet with Uronic Acid–Rich Polysaccharides Derived from Tremella fuciformis
Source: MDPI journal article supplement (doi:10.3390/polym14081514), 2022-04-08
Supplement: s1 [file s1]

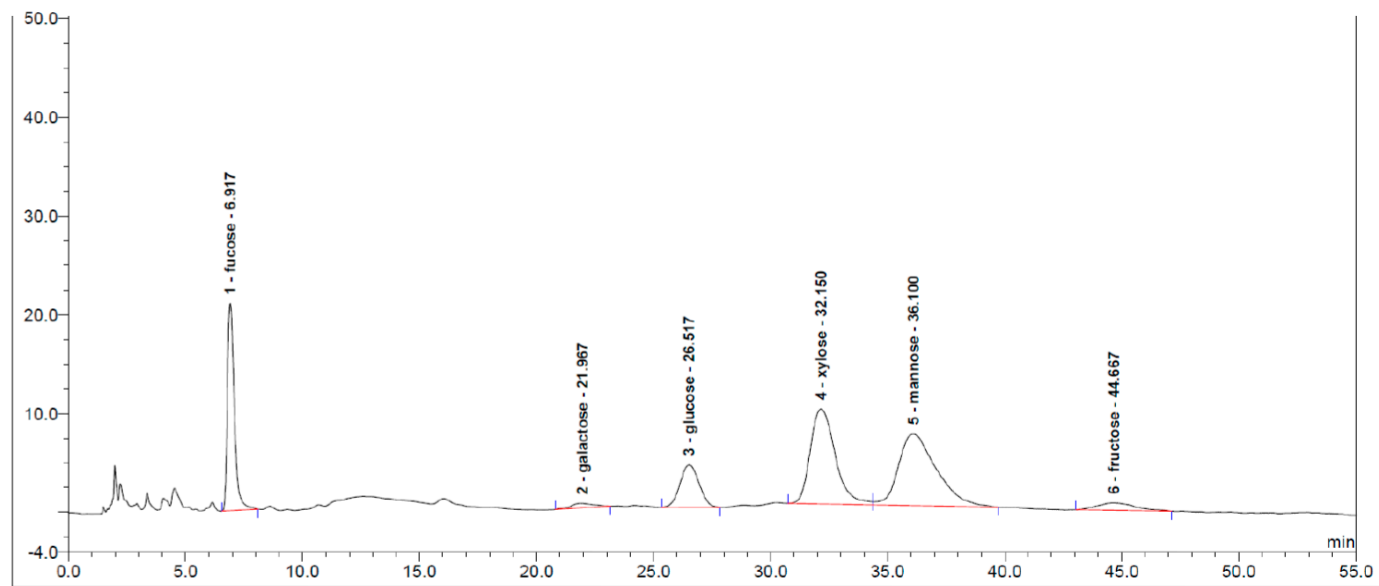

**Supplement Figure S1.** Monosaccharide composition analysis by HPAEC–PAD. TFPS was hydrolysis by 2M TFA.
